# Supplementary material for: Poly(2-vinylpyridine) brushes as a reaction chamber to fabricate spiky gold nanoparticles
Source: Royal Society of Chemistry journal article supplement (doi:10.1039/c7ra02906c), 2017-01-01
Supplement: c7ra02906c1.pdf [file c7ra02906c1.pdf]

# Supporting Information

## **Poly(2-vinylpyridine) Brushes as a Reaction Chamber to Fabricate Spiky Gold Nanoparticles**

Wenqin Wang,<sup>\*a</sup> Hanzhi Zou,<sup>a</sup> Mengying Shang,<sup>a</sup> Guoke Xing<sup>a</sup> and Tao Chen<sup>b</sup>

<sup>a</sup> School of Materials Science and Chemical Engineering, Ningbo University, Ningbo 315211, P. R. China.

<sup>b</sup> Ningbo Institute of Material Technology and Engineering, Chinese Academy of Science, Ningbo 315201, P. R. China.

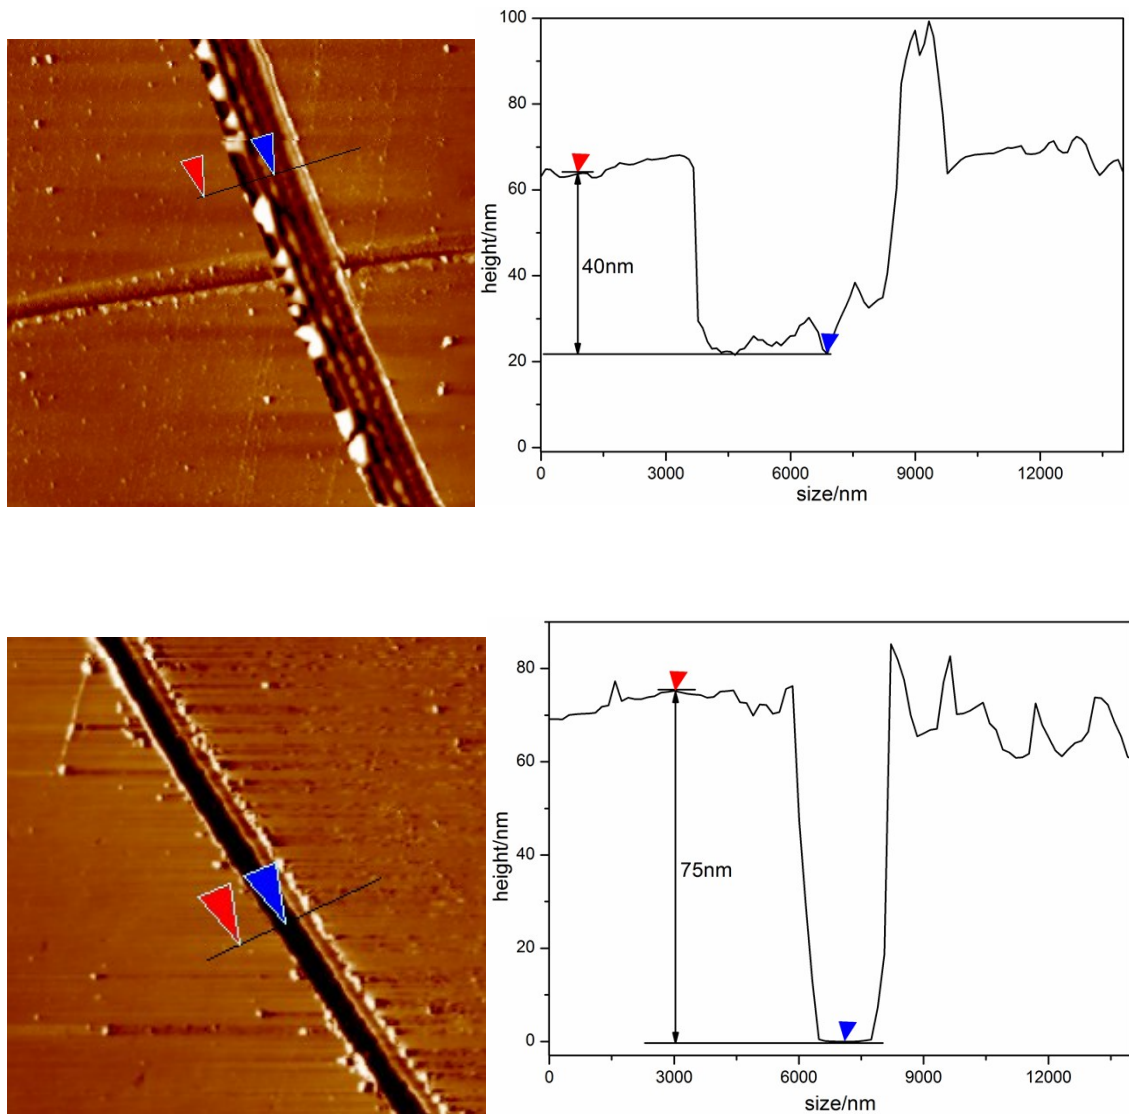

*Figure S1.* Tapping-mode AFM height images and before scanning, a needle was used to gently scratch a trace on the surface of the P2VP brushes grafted on the silicon surface by SIPGP.

The gold-PPy composites layer was peeled from silicon wafers and its TGA curve was shown in Figure S2. The TGA curve of gold-PPy composites showed a two-step weight loss. The initial weight loss below 200 °C was attributed to the evaporation of moisture. The second step corresponded the decomposed process of PPy and completely ended at around 600 °C.

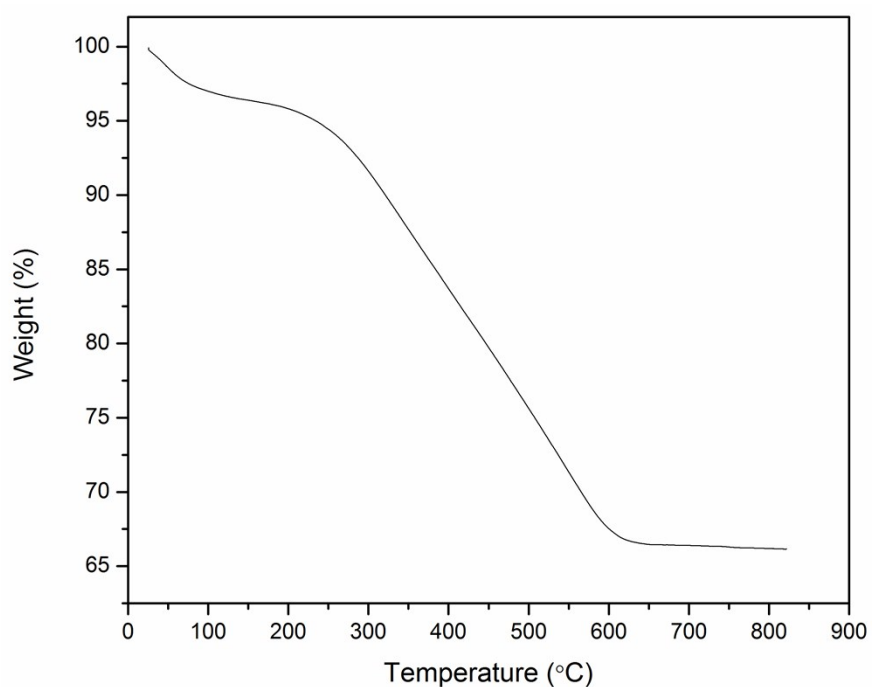

*Figure S2.* TGA curve of the gold-PPy composites peeled from silicon wafers.
